# Supplementary material
Source: publisher figshare collection journal article supplement (https://acs.figshare.com/ndownloader/files/5754876)
Supplement: Supplementary file 1 [file 5754876]

# ja970697x.cif

data_96208 
  
_audit_creation_method            SHELXL 
_chemical_name_systematic 
; 
 ? 
; 
_chemical_name_common             ? 
_chemical_formula_moiety          ? 
_chemical_formula_structural      ? 
_chemical_formula_analytical      ? 
_chemical_formula_sum             'C21 H50 Mo N4 Si3' 
_chemical_formula_weight          538.86 
_chemical_melting_point           ? 
_chemical_compound_source         ? 
  
loop_ 
 _atom_type_symbol 
 _atom_type_description 
 _atom_type_scat_dispersion_real 
 _atom_type_scat_dispersion_imag 
 _atom_type_scat_source 
 'C'  'C'   0.0033   0.0016 
 'International Tables Vol C Tables 4.2.6.8 and 6.1.1.4' 
 'H'  'H'   0.0000   0.0000 
 'International Tables Vol C Tables 4.2.6.8 and 6.1.1.4' 
 'N'  'N'   0.0061   0.0033 
 'International Tables Vol C Tables 4.2.6.8 and 6.1.1.4' 
 'Si'  'Si'   0.0817   0.0704 
 'International Tables Vol C Tables 4.2.6.8 and 6.1.1.4' 
 'Mo'  'Mo'  -1.6832   0.6857 
 'International Tables Vol C Tables 4.2.6.8 and 6.1.1.4' 
  
_symmetry_cell_setting            Hexagonal 
_symmetry_space_group_name_H-M    P6(3) 
  
loop_ 
 _symmetry_equiv_pos_as_xyz 
 'x, y, z' 
 '-y, x-y, z' 
 '-x+y, -x, z' 
 '-x, -y, z+1/2' 
 'y, -x+y, z+1/2' 
 'x-y, x, z+1/2' 
  
_cell_length_a                    20.820(6) 
_cell_length_b                    20.820(6) 
_cell_length_c                    11.680(5) 
_cell_angle_alpha                 90.00 
_cell_angle_beta                  90.00 
_cell_angle_gamma                 120.00 
_cell_volume                      4384.8(26) 
_cell_formula_units_Z             6 
_cell_measurement_temperature     183(2) 
_cell_measurement_reflns_used     ? 
_cell_measurement_theta_min       ? 
_cell_measurement_theta_max       ? 
  
_exptl_crystal_description        ? 
_exptl_crystal_colour             ? 
_exptl_crystal_size_max           0.20 
_exptl_crystal_size_mid           0.11 
_exptl_crystal_size_min           0.11 
_exptl_crystal_density_meas       ? 
_exptl_crystal_density_diffrn     1.224 
_exptl_crystal_density_method     ? 
_exptl_crystal_F_000              1728 
_exptl_absorpt_coefficient_mu     0.586 
_exptl_absorpt_correction_type    none 
_exptl_absorpt_correction_T_min   ? 
_exptl_absorpt_correction_T_max   ? 
  
_exptl_special_details 
; 
 ? 
; 
  
_diffrn_ambient_temperature       183(2) 
_diffrn_radiation_wavelength      0.71073 
_diffrn_radiation_type            MoK\a 
_diffrn_radiation_source          'fine-focus sealed tube' 
_diffrn_radiation_monochromator   graphite 
_diffrn_measurement_device        'Siemens P4' 
_diffrn_measurement_method        '\w scans' 
_diffrn_standards_number          ? 
_diffrn_standards_interval_count  ? 
_diffrn_standards_interval_time   ? 
_diffrn_standards_decay_%         ? 
_diffrn_reflns_number             12846 
_diffrn_reflns_av_R_equivalents   0.1181 
_diffrn_reflns_av_sigmaI/netI     0.0605 
_diffrn_reflns_limit_h_min        -19 
_diffrn_reflns_limit_h_max        23 
_diffrn_reflns_limit_k_min        -23 
_diffrn_reflns_limit_k_max        13 
_diffrn_reflns_limit_l_min        -12 
_diffrn_reflns_limit_l_max        12 
_diffrn_reflns_theta_min          1.13 
_diffrn_reflns_theta_max          20.00 
_reflns_number_total              2728 
_reflns_number_observed           2417 
_reflns_observed_criterion        >2sigma(I) 
  
_computing_data_collection        'Siemens XSCANS' 
_computing_cell_refinement        'Siemens XSCANS' 
_computing_data_reduction         'Siemens SHELXTL' 
_computing_structure_solution     'SHELXS-86 (Sheldrick, 1990)' 
_computing_structure_refinement   'SHELXL-93 (Sheldrick, 1993)' 
_computing_molecular_graphics     'Siemens SHELXTL' 
_computing_publication_material   'Siemens SHELXTL' 
  
_refine_special_details 
; 
 Refinement on F^2^ for ALL reflections except for 49 with very negative 
F^2^ 
 or flagged by the user for potential systematic errors.  Weighted 
R-factors 
 wR and all goodnesses of fit S are based on F^2^, conventional 
R-factors R 
 are based on F, with F set to zero for negative F^2^. The observed 
criterion 
 of F^2^ > 2sigma(F^2^) is used only for calculating _R_factor_obs etc. 
and is 
 not relevant to the choice of reflections for refinement.  R-factors 
based 
 on F^2^ are statistically about twice as large as those based on F, and 
R- 
 factors based on ALL data will be even larger. 
; 
  
_refine_ls_structure_factor_coef  Fsqd 
_refine_ls_matrix_type            full 
_refine_ls_weighting_scheme 
 'calc w=1/[\s^2^(Fo^2^)+(0.0522P)^2^+13.5431P] where 
P=(Fo^2^+2Fc^2^)/3' 
_atom_sites_solution_primary      direct 
_atom_sites_solution_secondary    difmap 
_atom_sites_solution_hydrogens    geom 
_refine_ls_hydrogen_treatment     ? 
_refine_ls_extinction_method      SHELXL 
_refine_ls_extinction_coef        0.0003(2) 
_refine_ls_extinction_expression 
 'Fc^*^=kFc[1+0.001xFc^2^\l^3^/sin(2\q)]^-1/4^' 
_refine_ls_abs_structure_details 
 'Flack H D (1983), Acta Cryst. A39, 876-881' 
_refine_ls_abs_structure_Flack    0.43(10) 
_refine_ls_number_reflns          2679 
_refine_ls_number_parameters      259 
_refine_ls_number_restraints      1 
_refine_ls_R_factor_all           0.0670 
_refine_ls_R_factor_obs           0.0569 
_refine_ls_wR_factor_all          0.1702 
_refine_ls_wR_factor_obs          0.1488 
_refine_ls_goodness_of_fit_all    1.113 
_refine_ls_goodness_of_fit_obs    1.142 
_refine_ls_restrained_S_all       1.224 
_refine_ls_restrained_S_obs       1.142 
_refine_ls_shift/esd_max          0.003 
_refine_ls_shift/esd_mean         0.001 
  
loop_ 
 _atom_site_label 
 _atom_site_type_symbol 
 _atom_site_fract_x 
 _atom_site_fract_y 
 _atom_site_fract_z 
 _atom_site_U_iso_or_equiv 
 _atom_site_thermal_displace_type 
 _atom_site_occupancy 
 _atom_site_calc_flag 
 _atom_site_refinement_flags 
 _atom_site_disorder_group 
Mo1 Mo -0.66417(3) 0.00133(4) -0.97544(11) 0.0237(4) Uani 1 d . . 
Si1 Si -0.49347(13) 0.15268(14) -1.0007(2) 0.0382(9) Uani 1 d . . 
Si2 Si -0.69201(13) -0.17258(13) -0.9932(2) 0.0350(7) Uani 1 d . . 
Si3 Si -0.81590(14) 0.02392(15) -0.9908(2) 0.0394(8) Uani 1 d . . 
N1 N -0.5564(4) 0.0649(4) -0.9422(6) 0.034(2) Uani 1 d . . 
N2 N -0.7105(4) -0.1061(4) -0.9310(7) 0.034(2) Uani 1 d . . 
N3 N -0.7273(4) 0.0457(4) -0.9419(6) 0.035(2) Uani 1 d . . 
N4 N -0.6603(4) 0.0075(4) -0.7683(9) 0.025(3) Uani 1 d . . 
C1 C -0.5373(5) 0.0459(6) -0.8327(9) 0.044(3) Uani 1 d . . 
H1A H -0.4836(5) 0.0786(6) -0.8184(9) 0.053 Uiso 1 calc R . 
H1B H -0.5474(5) -0.0059(6) -0.8355(9) 0.053 Uiso 1 calc R . 
C2 C -0.5806(5) 0.0537(5) -0.7360(9) 0.041(3) Uani 1 d . . 
H2A H -0.5705(5) 0.0358(5) -0.6634(9) 0.049 Uiso 1 calc R . 
H2B H -0.5671(5) 0.1062(5) -0.7263(9) 0.049 Uiso 1 calc R . 
C3 C -0.7452(5) -0.1194(5) -0.8216(9) 0.041(3) Uani 1 d . . 
H3A H -0.7655(5) -0.1722(5) -0.8010(9) 0.049 Uiso 1 calc R . 
H3B H -0.7872(5) -0.1099(5) -0.8260(9) 0.049 Uiso 1 calc R . 
C4 C -0.6928(6) -0.0715(6) -0.7292(8) 0.045(3) Uani 1 d . . 
H4A H -0.6530(6) -0.0839(6) -0.7178(8) 0.054 Uiso 1 calc R . 
H4B H -0.7196(6) -0.0793(6) -0.6559(8) 0.054 Uiso 1 calc R . 
C5 C -0.7054(6) 0.0880(6) -0.8338(8) 0.040(3) Uani 1 d . . 
H5A H -0.7401(6) 0.1064(6) -0.8173(8) 0.048 Uiso 1 calc R . 
H5B H -0.6550(6) 0.1315(6) -0.8421(8) 0.048 Uiso 1 calc R . 
C6 C -0.7062(5) 0.0415(5) -0.7366(9) 0.039(3) Uani 1 d . . 
H6A H -0.7577(5) 0.0021(5) -0.7201(9) 0.047 Uiso 1 calc R . 
H6B H -0.6857(5) 0.0724(5) -0.6671(9) 0.047 Uiso 1 calc R . 
C11 C -0.5413(5) 0.2080(5) -1.0278(10) 0.055(3) Uani 1 d . . 
H11A H -0.5646(5) 0.2114(5) -0.9569(10) 0.082 Uiso 1 calc R . 
H11B H -0.5793(5) 0.1833(5) -1.0869(10) 0.082 Uiso 1 calc R . 
H11C H -0.5048(5) 0.2579(5) -1.0537(10) 0.082 Uiso 1 calc R . 
C12 C -0.4179(6) 0.2054(6) -0.8960(11) 0.074(4) Uani 1 d . . 
H12A H -0.4392(6) 0.2104(6) -0.8240(11) 0.111 Uiso 1 calc R . 
H12B H -0.3838(6) 0.2547(6) -0.9269(11) 0.111 Uiso 1 calc R . 
H12C H -0.3909(6) 0.1789(6) -0.8819(11) 0.111 Uiso 1 calc R . 
C13 C -0.4490(7) 0.1456(7) -1.1337(12) 0.088(4) Uani 1 d . . 
H13A H -0.4872(7) 0.1180(7) -1.1915(12) 0.132 Uiso 1 calc R . 
H13B H -0.4217(7) 0.1196(7) -1.1175(12) 0.132 Uiso 1 calc R . 
H13C H -0.4146(7) 0.1954(7) -1.1625(12) 0.132 Uiso 1 calc R . 
C21 C -0.5912(5) -0.1327(5) -1.0166(10) 0.051(3) Uani 1 d . . 
H21A H -0.5646(5) -0.1115(5) -0.9448(10) 0.076 Uiso 1 calc R . 
H21B H -0.5742(5) -0.0937(5) -1.0750(10) 0.076 Uiso 1 calc R . 
H21C H -0.5814(5) -0.1718(5) -1.0425(10) 0.076 Uiso 1 calc R . 
C22 C -0.7210(6) -0.2516(5) -0.8891(11) 0.066(3) Uani 1 d . . 
H22A H -0.7743(6) -0.2746(5) -0.8739(11) 0.099 Uiso 1 calc R . 
H22B H -0.6935(6) -0.2327(5) -0.8173(11) 0.099 Uiso 1 calc R . 
H22C H -0.7103(6) -0.2886(5) -0.9220(11) 0.099 Uiso 1 calc R . 
C23 C -0.7487(7) -0.2147(6) -1.1233(11) 0.071(4) Uani 1 d . . 
H23A H -0.8013(7) -0.2346(6) -1.1049(11) 0.106 Uiso 1 calc R . 
H23B H -0.7411(7) -0.2549(6) -1.1506(11) 0.106 Uiso 1 calc R . 
H23C H -0.7339(7) -0.1769(6) -1.1831(11) 0.106 Uiso 1 calc R . 
C31 C -0.8529(6) -0.0496(7) -1.1038(13) 0.079(4) Uani 1 d . . 
H31A H -0.8188(6) -0.0331(7) -1.1692(13) 0.118 Uiso 1 calc R . 
H31B H -0.9017(6) -0.0588(7) -1.1289(13) 0.118 Uiso 1 calc R . 
H31C H -0.8575(6) -0.0954(7) -1.0725(13) 0.118 Uiso 1 calc R . 
C32 C -0.8858(6) -0.0149(6) -0.8731(11) 0.065(3) Uiso 1 d . . 
H32A H -0.8701(6) 0.0209(6) -0.8100(11) 0.097 Uiso 1 calc R . 
H32B H -0.8899(6) -0.0613(6) -0.8455(11) 0.097 Uiso 1 calc R . 
H32C H -0.9341(6) -0.0246(6) -0.9019(11) 0.097 Uiso 1 calc R . 
C33 C -0.8109(7) 0.1109(7) -1.0489(13) 0.078(4) Uani 1 d . . 
H33A H -0.7741(7) 0.1311(7) -1.1107(13) 0.117 Uiso 1 calc R . 
H33B H -0.7963(7) 0.1477(7) -0.9875(13) 0.117 Uiso 1 calc R . 
H33C H -0.8596(7) 0.0991(7) -1.0788(13) 0.117 Uiso 1 calc R . 
C101 C -0.6735(6) -0.0053(5) -1.1604(12) 0.034(5) Uani 1 d . . 
H10A H -0.7256(6) -0.0461(5) -1.1739(12) 0.041 Uiso 1 calc R . 
C102 C -0.6265(5) -0.0295(5) -1.2307(9) 0.044(3) Uani 1 d . . 
H10B H -0.6327(5) -0.0761(5) -1.1978(9) 0.053 Uiso 1 calc R . 
H10C H -0.5736(5) 0.0089(5) -1.2229(9) 0.053 Uiso 1 calc R . 
C103 C -0.6465(6) -0.0419(6) -1.3599(11) 0.060(3) Uani 1 d . . 
H10D H -0.6098(6) -0.0507(6) -1.4004(11) 0.073 Uiso 1 calc R . 
H10E H -0.6958(6) -0.0867(6) -1.3691(11) 0.073 Uiso 1 calc R . 
C104 C -0.6476(8) 0.0235(8) -1.4138(10) 0.065(4) Uani 1 d . . 
H10F H -0.5962(8) 0.0658(8) -1.4182(10) 0.077 Uiso 1 calc R . 
H10G H -0.6669(8) 0.0103(8) -1.4929(10) 0.077 Uiso 1 calc R . 
C105 C -0.6947(7) 0.0470(6) -1.3477(11) 0.065(4) Uani 1 d . . 
H10H H -0.7474(7) 0.0074(6) -1.3514(11) 0.078 Uiso 1 calc R . 
H10I H -0.6904(7) 0.0924(6) -1.3825(11) 0.078 Uiso 1 calc R . 
C106 C -0.6696(5) 0.0621(5) -1.2235(9) 0.040(3) Uani 1 d . . 
H10J H -0.7009(5) 0.0778(5) -1.1819(9) 0.047 Uiso 1 calc R . 
H10K H -0.6179(5) 0.1038(5) -1.2209(9) 0.047 Uiso 1 calc R . 
  
loop_ 
 _atom_site_aniso_label 
 _atom_site_aniso_U_11 
 _atom_site_aniso_U_22 
 _atom_site_aniso_U_33 
 _atom_site_aniso_U_23 
 _atom_site_aniso_U_13 
 _atom_site_aniso_U_12 
Mo1 0.0197(5) 0.0207(5) 0.0322(6) -0.0034(4) -0.0026(5) 0.0111(4) 
Si1 0.0290(14) 0.0275(14) 0.053(2) 0.0045(15) 0.0089(14) 0.0103(12) 
Si2 0.0332(14) 0.0219(13) 0.052(2) -0.0023(14) -0.002(2) 0.0152(11) 
Si3 0.0318(14) 0.050(2) 0.043(2) -0.006(2) -0.001(2) 0.0259(12) 
N1 0.019(4) 0.039(5) 0.039(5) 0.000(4) 0.000(3) 0.009(4) 
N2 0.021(4) 0.011(4) 0.059(6) -0.003(3) -0.003(4) 0.000(3) 
N3 0.031(4) 0.032(4) 0.051(6) -0.002(4) 0.006(4) 0.022(4) 
N4 0.040(7) 0.018(5) 0.013(6) 0.003(3) -0.006(3) 0.012(4) 
C1 0.022(6) 0.059(7) 0.048(7) 0.001(5) -0.003(5) 0.017(6) 
C2 0.045(7) 0.018(5) 0.053(7) -0.002(5) -0.021(6) 0.012(5) 
C3 0.036(6) 0.031(6) 0.058(8) 0.020(6) 0.019(6) 0.018(5) 
C4 0.063(7) 0.066(8) 0.019(6) -0.015(6) -0.006(6) 0.043(7) 
C5 0.048(7) 0.044(7) 0.037(7) 0.003(5) -0.008(5) 0.030(6) 
C6 0.034(6) 0.030(6) 0.055(7) -0.006(6) 0.006(5) 0.016(5) 
C11 0.037(6) 0.038(6) 0.096(9) 0.021(6) 0.021(6) 0.023(5) 
C12 0.069(8) 0.039(7) 0.101(10) -0.016(7) -0.033(8) 0.018(6) 
C13 0.076(9) 0.065(9) 0.098(11) 0.021(8) 0.038(8) 0.017(8) 
C21 0.036(6) 0.044(6) 0.075(9) -0.004(6) 0.000(6) 0.022(5) 
C22 0.063(7) 0.034(6) 0.102(10) 0.022(7) 0.021(7) 0.024(6) 
C23 0.081(9) 0.050(7) 0.089(9) -0.009(7) -0.013(8) 0.039(7) 
C31 0.028(6) 0.087(10) 0.094(10) -0.050(8) -0.022(6) 0.008(6) 
C33 0.089(9) 0.063(8) 0.108(10) 0.012(7) -0.008(8) 0.057(8) 
C101 0.029(7) 0.040(8) 0.032(9) -0.001(5) -0.006(5) 0.016(5) 
C102 0.053(6) 0.044(6) 0.046(7) -0.003(5) 0.000(6) 0.033(6) 
C103 0.077(8) 0.069(8) 0.055(8) -0.018(7) -0.012(7) 0.051(7) 
C104 0.112(10) 0.066(8) 0.029(6) -0.024(7) -0.026(7) 0.054(7) 
C105 0.113(10) 0.062(8) 0.057(8) 0.005(6) 0.009(7) 0.072(8) 
C106 0.053(7) 0.034(6) 0.038(6) -0.002(5) 0.015(6) 0.026(5) 
  
_geom_special_details 
; 
 All esds (except the esd in the dihedral angle between two l.s. planes) 
 are estimated using the full covariance matrix.  The cell esds are 
taken 
 into account individually in the estimation of esds in distances, 
angles 
 and torsion angles; correlations between esds in cell parameters are 
only 
 used when they are defined by crystal symmetry.  An approximate 
(isotropic) 
 treatment of cell esds is used for estimating esds involving l.s. 
planes. 
; 
  
loop_ 
 _geom_bond_atom_site_label_1 
 _geom_bond_atom_site_label_2 
 _geom_bond_distance 
 _geom_bond_site_symmetry_2 
 _geom_bond_publ_flag 
Mo1 N3 1.987(7) . ? 
Mo1 N1 1.991(7) . ? 
Mo1 N2 2.012(7) . ? 
Mo1 C101 2.167(14) . ? 
Mo1 N4 2.422(10) . ? 
Si1 N1 1.769(8) . ? 
Si1 C13 1.852(13) . ? 
Si1 C12 1.857(11) . ? 
Si1 C11 1.888(9) . ? 
Si2 N2 1.767(8) . ? 
Si2 C21 1.852(9) . ? 
Si2 C23 1.854(12) . ? 
Si2 C22 1.886(11) . ? 
Si3 N3 1.760(8) . ? 
Si3 C32 1.867(12) . ? 
Si3 C31 1.871(12) . ? 
Si3 C33 1.888(11) . ? 
N1 C1 1.452(12) . ? 
N2 C3 1.426(12) . ? 
N3 C5 1.475(12) . ? 
N4 C6 1.491(11) . ? 
N4 C2 1.491(12) . ? 
N4 C4 1.504(13) . ? 
C1 C2 1.504(14) . ? 
C3 C4 1.504(14) . ? 
C5 C6 1.488(14) . ? 
C101 C102 1.542(14) . ? 
C101 C106 1.551(13) . ? 
C102 C103 1.553(14) . ? 
C103 C104 1.51(2) . ? 
C104 C105 1.509(14) . ? 
C105 C106 1.521(14) . ? 
  
loop_ 
 _geom_angle_atom_site_label_1 
 _geom_angle_atom_site_label_2 
 _geom_angle_atom_site_label_3 
 _geom_angle 
 _geom_angle_site_symmetry_1 
 _geom_angle_site_symmetry_3 
 _geom_angle_publ_flag 
N3 Mo1 N1 116.1(3) . . ? 
N3 Mo1 N2 113.9(3) . . ? 
N1 Mo1 N2 116.3(3) . . ? 
N3 Mo1 C101 99.6(3) . . ? 
N1 Mo1 C101 105.8(3) . . ? 
N2 Mo1 C101 102.0(3) . . ? 
N3 Mo1 N4 77.9(3) . . ? 
N1 Mo1 N4 76.9(3) . . ? 
N2 Mo1 N4 77.7(3) . . ? 
C101 Mo1 N4 177.0(3) . . ? 
N1 Si1 C13 112.5(5) . . ? 
N1 Si1 C12 109.1(5) . . ? 
C13 Si1 C12 106.9(6) . . ? 
N1 Si1 C11 110.5(4) . . ? 
C13 Si1 C11 110.2(6) . . ? 
C12 Si1 C11 107.4(5) . . ? 
N2 Si2 C21 110.6(4) . . ? 
N2 Si2 C23 111.7(4) . . ? 
C21 Si2 C23 113.7(6) . . ? 
N2 Si2 C22 108.6(5) . . ? 
C21 Si2 C22 106.5(5) . . ? 
C23 Si2 C22 105.4(5) . . ? 
N3 Si3 C32 111.2(5) . . ? 
N3 Si3 C31 112.9(4) . . ? 
C32 Si3 C31 104.6(5) . . ? 
N3 Si3 C33 108.8(5) . . ? 
C32 Si3 C33 109.7(6) . . ? 
C31 Si3 C33 109.5(7) . . ? 
C1 N1 Si1 117.3(6) . . ? 
C1 N1 Mo1 111.2(6) . . ? 
Si1 N1 Mo1 128.2(4) . . ? 
C3 N2 Si2 120.3(6) . . ? 
C3 N2 Mo1 111.2(6) . . ? 
Si2 N2 Mo1 126.4(4) . . ? 
C5 N3 Si3 113.7(6) . . ? 
C5 N3 Mo1 111.6(6) . . ? 
Si3 N3 Mo1 131.9(4) . . ? 
C6 N4 C2 113.7(7) . . ? 
C6 N4 C4 113.6(7) . . ? 
C2 N4 C4 112.0(7) . . ? 
C6 N4 Mo1 105.1(6) . . ? 
C2 N4 Mo1 106.5(6) . . ? 
C4 N4 Mo1 105.1(6) . . ? 
N1 C1 C2 111.7(8) . . ? 
N4 C2 C1 106.0(8) . . ? 
N2 C3 C4 112.7(8) . . ? 
C3 C4 N4 106.7(8) . . ? 
N3 C5 C6 111.4(8) . . ? 
C5 C6 N4 108.6(8) . . ? 
C102 C101 C106 106.7(10) . . ? 
C102 C101 Mo1 120.0(7) . . ? 
C106 C101 Mo1 116.9(7) . . ? 
C101 C102 C103 114.2(9) . . ? 
C104 C103 C102 112.2(9) . . ? 
C105 C104 C103 112.7(11) . . ? 
C104 C105 C106 110.0(9) . . ? 
C105 C106 C101 114.2(9) . . ? 
  
_refine_diff_density_max    0.653 
_refine_diff_density_min   -0.421 
_refine_diff_density_rms    0.082


data_96150 
  
_audit_creation_method            SHELXL 
_chemical_name_systematic 
; 
 ? 
; 
_chemical_name_common             ? 
_chemical_formula_moiety          ? 
_chemical_formula_structural      ? 
_chemical_formula_analytical      ? 
_chemical_formula_sum             'C15 H38 Mo N4 Si3' 
_chemical_formula_weight          454.70 
_chemical_melting_point           ? 
_chemical_compound_source         ? 
  
loop_ 
 _atom_type_symbol 
 _atom_type_description 
 _atom_type_scat_dispersion_real 
 _atom_type_scat_dispersion_imag 
 _atom_type_scat_source 
 'C'  'C'   0.0033   0.0016 
 'International Tables Vol C Tables 4.2.6.8 and 6.1.1.4' 
 'H'  'H'   0.0000   0.0000 
 'International Tables Vol C Tables 4.2.6.8 and 6.1.1.4' 
 'N'  'N'   0.0061   0.0033 
 'International Tables Vol C Tables 4.2.6.8 and 6.1.1.4' 
 'Si'  'Si'   0.0817   0.0704 
 'International Tables Vol C Tables 4.2.6.8 and 6.1.1.4' 
 'Mo'  'Mo'  -1.6832   0.6857 
 'International Tables Vol C Tables 4.2.6.8 and 6.1.1.4' 
  
_symmetry_cell_setting            Monoclinic 
_symmetry_space_group_name_H-M    P2(1)/n 
  
loop_ 
 _symmetry_equiv_pos_as_xyz 
 'x, y, z' 
 '-x+1/2, y+1/2, -z+1/2' 
 '-x, -y, -z' 
 'x-1/2, -y-1/2, z-1/2' 
  
_cell_length_a                    8.972(3) 
_cell_length_b                    17.308(4) 
_cell_length_c                    15.398(3) 
_cell_angle_alpha                 90.00 
_cell_angle_beta                  100.61(3) 
_cell_angle_gamma                 90.00 
_cell_volume                      2350.2(11) 
_cell_formula_units_Z             4 
_cell_measurement_temperature     188(2) 
_cell_measurement_reflns_used     ? 
_cell_measurement_theta_min       ? 
_cell_measurement_theta_max       ? 
  
_exptl_crystal_description        ? 
_exptl_crystal_colour             ? 
_exptl_crystal_size_max           0.60 
_exptl_crystal_size_mid           0.43 
_exptl_crystal_size_min           0.34 
_exptl_crystal_density_meas       ? 
_exptl_crystal_density_diffrn     1.285 
_exptl_crystal_density_method     ? 
_exptl_crystal_F_000              960 
_exptl_absorpt_coefficient_mu     0.716 
_exptl_absorpt_correction_type    empirical 
_exptl_absorpt_correction_T_min   0.2595 
_exptl_absorpt_correction_T_max   0.3072 
  
_exptl_special_details 
; 
 ? 
; 
  
_diffrn_ambient_temperature       188(2) 
_diffrn_radiation_wavelength      0.71073 
_diffrn_radiation_type            MoK\a 
_diffrn_radiation_source          'fine-focus sealed tube' 
_diffrn_radiation_monochromator   graphite 
_diffrn_measurement_device        'Siemens P4' 
_diffrn_measurement_method        '\w scans' 
_diffrn_standards_number          ? 
_diffrn_standards_interval_count  ? 
_diffrn_standards_interval_time   ? 
_diffrn_standards_decay_%         ? 
_diffrn_reflns_number             9331 
_diffrn_reflns_av_R_equivalents   0.0240 
_diffrn_reflns_av_sigmaI/netI     0.0204 
_diffrn_reflns_limit_h_min        -8 
_diffrn_reflns_limit_h_max        9 
_diffrn_reflns_limit_k_min        -16 
_diffrn_reflns_limit_k_max        19 
_diffrn_reflns_limit_l_min        -16 
_diffrn_reflns_limit_l_max        16 
_diffrn_reflns_theta_min          1.79 
_diffrn_reflns_theta_max          23.26 
_reflns_number_total              3337 
_reflns_number_observed           3248 
_reflns_observed_criterion        >2sigma(I) 
  
_computing_data_collection        'Siemens XSCANS' 
_computing_cell_refinement        'Siemens XSCANS' 
_computing_data_reduction         'Siemens SHELXTL' 
_computing_structure_solution     'SHELXS-86 (Sheldrick, 1990)' 
_computing_structure_refinement   'SHELXL-93 (Sheldrick, 1993)' 
_computing_molecular_graphics     'Siemens SHELXTL' 
_computing_publication_material   'Siemens SHELXTL' 
  
_refine_special_details 
; 
 Refinement on F^2^ for ALL reflections except for 2 with very negative 
F^2^ 
 or flagged by the user for potential systematic errors.  Weighted 
R-factors 
 wR and all goodnesses of fit S are based on F^2^, conventional 
R-factors R 
 are based on F, with F set to zero for negative F^2^. The observed 
criterion 
 of F^2^ > 2sigma(F^2^) is used only for calculating _R_factor_obs etc. 
and is 
 not relevant to the choice of reflections for refinement.  R-factors 
based 
 on F^2^ are statistically about twice as large as those based on F, and 
R- 
 factors based on ALL data will be even larger. 
; 
  
_refine_ls_structure_factor_coef  Fsqd 
_refine_ls_matrix_type            full 
_refine_ls_weighting_scheme 
 'calc w=1/[\s^2^(Fo^2^)+(0.0177P)^2^+2.2313P] where P=(Fo^2^+2Fc^2^)/3' 
_atom_sites_solution_primary      direct 
_atom_sites_solution_secondary    difmap 
_atom_sites_solution_hydrogens    geom 
_refine_ls_hydrogen_treatment     ? 
_refine_ls_extinction_method      SHELXL 
_refine_ls_extinction_coef        0.0045(6) 
_refine_ls_extinction_expression 
 'Fc^*^=kFc[1+0.001xFc^2^\l^3^/sin(2\q)]^-1/4^' 
_refine_ls_number_reflns          3335 
_refine_ls_number_parameters      204 
_refine_ls_number_restraints      0 
_refine_ls_R_factor_all           0.0242 
_refine_ls_R_factor_obs           0.0231 
_refine_ls_wR_factor_all          0.0583 
_refine_ls_wR_factor_obs          0.0572 
_refine_ls_goodness_of_fit_all    1.125 
_refine_ls_goodness_of_fit_obs    1.126 
_refine_ls_restrained_S_all       1.132 
_refine_ls_restrained_S_obs       1.126 
_refine_ls_shift/esd_max          0.002 
_refine_ls_shift/esd_mean         0.000 
  
loop_ 
 _atom_site_label 
 _atom_site_type_symbol 
 _atom_site_fract_x 
 _atom_site_fract_y 
 _atom_site_fract_z 
 _atom_site_U_iso_or_equiv 
 _atom_site_thermal_displace_type 
 _atom_site_occupancy 
 _atom_site_calc_flag 
 _atom_site_refinement_flags 
 _atom_site_disorder_group 
Mo1 Mo 0.14629(2) 0.578869(11) 0.262823(12) 0.02174(10) Uani 1 d . . 
Si1 Si 0.38603(7) 0.63810(4) 0.39565(4) 0.0276(2) Uani 1 d . . 
Si2 Si 0.04582(8) 0.40874(4) 0.33624(4) 0.0281(2) Uani 1 d . . 
Si3 Si 0.26953(8) 0.57173(4) 0.07179(4) 0.0295(2) Uani 1 d . . 
N1 N 0.2066(2) 0.66554(11) 0.34224(13) 0.0295(5) Uani 1 d . . 
N2 N 0.0042(2) 0.50279(11) 0.29908(12) 0.0267(4) Uani 1 d . . 
N3 N 0.1316(2) 0.59582(12) 0.13342(12) 0.0284(4) Uani 1 d . . 
N4 N -0.0647(2) 0.65061(11) 0.23763(12) 0.0269(4) Uani 1 d . . 
C1 C 0.1000(3) 0.72687(14) 0.3523(2) 0.0337(6) Uani 1 d . . 
H1A H 0.1537(3) 0.77697(14) 0.3619(2) 0.040 Uiso 1 calc R . 
H1B H 0.0516(3) 0.71623(14) 0.4039(2) 0.040 Uiso 1 calc R . 
C2 C -0.0202(3) 0.73014(15) 0.2681(2) 0.0378(6) Uani 1 d . . 
H2A H -0.1102(3) 0.75856(15) 0.2797(2) 0.045 Uiso 1 calc R . 
H2B H 0.0206(3) 0.75804(15) 0.2214(2) 0.045 Uiso 1 calc R . 
C3 C 0.0100(3) 0.6492(2) 0.0920(2) 0.0354(6) Uani 1 d . . 
H3A H -0.0256(3) 0.6342(2) 0.0295(2) 0.042 Uiso 1 calc R . 
H3B H 0.0504(3) 0.7025(2) 0.0931(2) 0.042 Uiso 1 calc R . 
C4 C -0.1568(3) 0.52742(14) 0.2882(2) 0.0313(5) Uani 1 d . . 
H4A H -0.2029(3) 0.50496(14) 0.3362(2) 0.038 Uiso 1 calc R . 
H4B H -0.2138(3) 0.50796(14) 0.2312(2) 0.038 Uiso 1 calc R . 
C5 C -0.1683(3) 0.6148(2) 0.2906(2) 0.0344(6) Uani 1 d . . 
H5A H -0.2739(3) 0.6308(2) 0.2668(2) 0.041 Uiso 1 calc R . 
H5B H -0.1419(3) 0.6330(2) 0.3525(2) 0.041 Uiso 1 calc R . 
C6 C -0.1222(3) 0.6466(2) 0.1413(2) 0.0370(6) Uani 1 d . . 
H6A H -0.1913(3) 0.6906(2) 0.1228(2) 0.044 Uiso 1 calc R . 
H6B H -0.1801(3) 0.5981(2) 0.1269(2) 0.044 Uiso 1 calc R . 
C11 C 0.3859(3) 0.55041(15) 0.3270(2) 0.0335(6) Uiso 1 d . . 
H11A H 0.3959(3) 0.50164(15) 0.3612(2) 0.040 Uiso 1 calc R . 
H11B H 0.4591(3) 0.55231(15) 0.2861(2) 0.040 Uiso 1 calc R . 
C12 C 0.5265(3) 0.7154(2) 0.3850(2) 0.0372(6) Uani 1 d . . 
H12A H 0.5144(3) 0.7582(2) 0.4247(2) 0.056 Uiso 1 calc R . 
H12B H 0.5095(3) 0.7341(2) 0.3239(2) 0.056 Uiso 1 calc R . 
H12C H 0.6294(3) 0.6944(2) 0.4008(2) 0.056 Uiso 1 calc R . 
C13 C 0.3907(4) 0.6219(2) 0.5158(2) 0.0517(8) Uani 1 d . . 
H13A H 0.3904(4) 0.6719(2) 0.5458(2) 0.078 Uiso 1 calc R . 
H13B H 0.4828(4) 0.5933(2) 0.5411(2) 0.078 Uiso 1 calc R . 
H13C H 0.3014(4) 0.5921(2) 0.5238(2) 0.078 Uiso 1 calc R . 
C21 C 0.1072(4) 0.4063(2) 0.4588(2) 0.0468(7) Uani 1 d . . 
H21A H 0.0287(4) 0.4300(2) 0.4868(2) 0.070 Uiso 1 calc R . 
H21B H 0.2022(4) 0.4351(2) 0.4755(2) 0.070 Uiso 1 calc R . 
H21C H 0.1228(4) 0.3526(2) 0.4786(2) 0.070 Uiso 1 calc R . 
C22 C -0.1285(3) 0.3478(2) 0.3059(2) 0.0409(6) Uani 1 d . . 
H22A H -0.2104(3) 0.3698(2) 0.3324(2) 0.061 Uiso 1 calc R . 
H22B H -0.1068(3) 0.2952(2) 0.3280(2) 0.061 Uiso 1 calc R . 
H22C H -0.1596(3) 0.3467(2) 0.2415(2) 0.061 Uiso 1 calc R . 
C23 C 0.1960(3) 0.36359(15) 0.2838(2) 0.0401(6) Uani 1 d . . 
H23A H 0.1644(3) 0.36466(15) 0.2194(2) 0.060 Uiso 1 calc R . 
H23B H 0.2115(3) 0.30994(15) 0.3037(2) 0.060 Uiso 1 calc R . 
H23C H 0.2909(3) 0.39244(15) 0.3006(2) 0.060 Uiso 1 calc R . 
C31 C 0.4259(3) 0.6446(2) 0.0899(2) 0.0542(8) Uani 1 d . . 
H31A H 0.3840(3) 0.6961(2) 0.0745(2) 0.081 Uiso 1 calc R . 
H31B H 0.5000(3) 0.6319(2) 0.0526(2) 0.081 Uiso 1 calc R . 
H31C H 0.4758(3) 0.6439(2) 0.1521(2) 0.081 Uiso 1 calc R . 
C32 C 0.3474(3) 0.4735(2) 0.1008(2) 0.0478(7) Uani 1 d . . 
H32A H 0.2648(3) 0.4357(2) 0.0911(2) 0.072 Uiso 1 calc R . 
H32B H 0.3972(3) 0.4726(2) 0.1631(2) 0.072 Uiso 1 calc R . 
H32C H 0.4214(3) 0.4605(2) 0.0635(2) 0.072 Uiso 1 calc R . 
C33 C 0.1871(3) 0.5714(2) -0.0489(2) 0.0434(7) Uani 1 d . . 
H33A H 0.1448(3) 0.6225(2) -0.0664(2) 0.065 Uiso 1 calc R . 
H33B H 0.1065(3) 0.5325(2) -0.0609(2) 0.065 Uiso 1 calc R . 
H33C H 0.2666(3) 0.5590(2) -0.0826(2) 0.065 Uiso 1 calc R . 
  
loop_ 
 _atom_site_aniso_label 
 _atom_site_aniso_U_11 
 _atom_site_aniso_U_22 
 _atom_site_aniso_U_33 
 _atom_site_aniso_U_23 
 _atom_site_aniso_U_13 
 _atom_site_aniso_U_12 
Mo1 0.01877(14) 0.02428(14) 0.02250(14) 0.00157(8) 0.00463(8) 0.00335(7) 
Si1 0.0249(3) 0.0291(4) 0.0276(3) 0.0011(3) 0.0018(3) 0.0011(3) 
Si2 0.0315(4) 0.0261(3) 0.0273(4) 0.0000(3) 0.0071(3) -0.0012(3) 
Si3 0.0285(4) 0.0351(4) 0.0270(4) -0.0020(3) 0.0104(3) 0.0024(3) 
N1 0.0260(11) 0.0298(11) 0.0318(11) -0.0012(9) 0.0032(8) 0.0025(8) 
N2 0.0232(10) 0.0303(11) 0.0271(10) 0.0024(8) 0.0060(8) 0.0014(8) 
N3 0.0245(10) 0.0362(11) 0.0253(10) 0.0042(9) 0.0070(8) 0.0070(9) 
N4 0.0224(10) 0.0320(11) 0.0270(10) 0.0028(8) 0.0066(8) 0.0054(8) 
C1 0.0318(13) 0.0293(13) 0.0404(14) -0.0051(11) 0.0077(11) 0.0034(11) 
C2 0.0338(14) 0.0320(14) 0.048(2) 0.0024(12) 0.0091(12) 0.0101(11) 
C3 0.0322(14) 0.047(2) 0.0278(13) 0.0099(11) 0.0070(11) 0.0121(12) 
C4 0.0238(12) 0.0392(14) 0.0319(13) 0.0013(11) 0.0075(10) -0.0008(11) 
C5 0.0247(13) 0.045(2) 0.0344(14) 0.0019(12) 0.0089(10) 0.0058(11) 
C6 0.0286(13) 0.048(2) 0.0335(14) 0.0059(12) 0.0036(11) 0.0119(12) 
C12 0.0308(14) 0.0383(15) 0.0419(15) -0.0035(12) 0.0052(11) -0.0022(11) 
C13 0.059(2) 0.061(2) 0.034(2) 0.0072(14) 0.0036(13) -0.006(2) 
C21 0.065(2) 0.040(2) 0.0331(15) 0.0044(12) 0.0029(13) 0.0083(14) 
C22 0.041(2) 0.0348(15) 0.049(2) -0.0008(12) 0.0158(13) -0.0086(12) 
C23 0.0390(15) 0.0301(14) 0.053(2) -0.0028(12) 0.0145(13) 0.0002(12) 
C31 0.040(2) 0.066(2) 0.061(2) -0.016(2) 0.0230(15) -0.0127(15) 
C32 0.054(2) 0.051(2) 0.043(2) 0.0013(13) 0.0187(14) 0.0189(14) 
C33 0.052(2) 0.051(2) 0.0296(14) -0.0038(12) 0.0123(12) 0.0095(13) 
  
_geom_special_details 
; 
 All esds (except the esd in the dihedral angle between two l.s. planes) 
 are estimated using the full covariance matrix.  The cell esds are 
taken 
 into account individually in the estimation of esds in distances, 
angles 
 and torsion angles; correlations between esds in cell parameters are 
only 
 used when they are defined by crystal symmetry.  An approximate 
(isotropic) 
 treatment of cell esds is used for estimating esds involving l.s. 
planes. 
; 
  
loop_ 
 _geom_bond_atom_site_label_1 
 _geom_bond_atom_site_label_2 
 _geom_bond_distance 
 _geom_bond_site_symmetry_2 
 _geom_bond_publ_flag 
Mo1 N1 1.948(2) . ? 
Mo1 N2 1.983(2) . ? 
Mo1 N3 1.994(2) . ? 
Mo1 N4 2.237(2) . ? 
Mo1 C11 2.249(3) . ? 
Mo1 Si1 2.8705(11) . ? 
Si1 N1 1.734(2) . ? 
Si1 C11 1.849(3) . ? 
Si1 C13 1.865(3) . ? 
Si1 C12 1.866(3) . ? 
Si2 N2 1.743(2) . ? 
Si2 C23 1.865(3) . ? 
Si2 C21 1.867(3) . ? 
Si2 C22 1.873(3) . ? 
Si3 N3 1.743(2) . ? 
Si3 C32 1.861(3) . ? 
Si3 C31 1.869(3) . ? 
Si3 C33 1.869(3) . ? 
N1 C1 1.456(3) . ? 
N2 C4 1.486(3) . ? 
N3 C3 1.481(3) . ? 
N4 C6 1.479(3) . ? 
N4 C5 1.481(3) . ? 
N4 C2 1.485(3) . ? 
C1 C2 1.527(4) . ? 
C3 C6 1.523(3) . ? 
C4 C5 1.517(4) . ? 
  
loop_ 
 _geom_angle_atom_site_label_1 
 _geom_angle_atom_site_label_2 
 _geom_angle_atom_site_label_3 
 _geom_angle 
 _geom_angle_site_symmetry_1 
 _geom_angle_site_symmetry_3 
 _geom_angle_publ_flag 
N1 Mo1 N2 116.95(8) . . ? 
N1 Mo1 N3 118.27(8) . . ? 
N2 Mo1 N3 116.83(8) . . ? 
N1 Mo1 N4 79.03(8) . . ? 
N2 Mo1 N4 81.40(8) . . ? 
N3 Mo1 N4 81.20(7) . . ? 
N1 Mo1 C11 76.13(9) . . ? 
N2 Mo1 C11 110.04(9) . . ? 
N3 Mo1 C11 110.68(9) . . ? 
N4 Mo1 C11 155.16(8) . . ? 
N1 Mo1 Si1 36.16(6) . . ? 
N2 Mo1 Si1 118.21(6) . . ? 
N3 Mo1 Si1 124.22(6) . . ? 
N4 Mo1 Si1 115.11(6) . . ? 
C11 Mo1 Si1 40.09(7) . . ? 
N1 Si1 C11 92.93(11) . . ? 
N1 Si1 C13 111.17(13) . . ? 
C11 Si1 C13 116.21(13) . . ? 
N1 Si1 C12 110.19(11) . . ? 
C11 Si1 C12 117.86(12) . . ? 
C13 Si1 C12 107.62(13) . . ? 
N1 Si1 Mo1 41.53(7) . . ? 
C11 Si1 Mo1 51.56(8) . . ? 
C13 Si1 Mo1 122.04(10) . . ? 
C12 Si1 Mo1 128.54(9) . . ? 
N2 Si2 C23 112.15(11) . . ? 
N2 Si2 C21 110.98(11) . . ? 
C23 Si2 C21 109.07(14) . . ? 
N2 Si2 C22 108.99(11) . . ? 
C23 Si2 C22 107.03(13) . . ? 
C21 Si2 C22 108.47(14) . . ? 
N3 Si3 C32 111.15(11) . . ? 
N3 Si3 C31 110.24(12) . . ? 
C32 Si3 C31 110.00(15) . . ? 
N3 Si3 C33 110.56(12) . . ? 
C32 Si3 C33 107.36(13) . . ? 
C31 Si3 C33 107.42(14) . . ? 
C1 N1 Si1 136.1(2) . . ? 
C1 N1 Mo1 121.1(2) . . ? 
Si1 N1 Mo1 102.30(10) . . ? 
C4 N2 Si2 116.7(2) . . ? 
C4 N2 Mo1 116.09(15) . . ? 
Si2 N2 Mo1 127.08(10) . . ? 
C3 N3 Si3 117.07(15) . . ? 
C3 N3 Mo1 115.47(14) . . ? 
Si3 N3 Mo1 125.87(11) . . ? 
C6 N4 C5 113.2(2) . . ? 
C6 N4 C2 112.6(2) . . ? 
C5 N4 C2 111.9(2) . . ? 
C6 N4 Mo1 106.01(14) . . ? 
C5 N4 Mo1 105.62(14) . . ? 
C2 N4 Mo1 106.87(14) . . ? 
N1 C1 C2 108.2(2) . . ? 
N4 C2 C1 109.9(2) . . ? 
N3 C3 C6 110.3(2) . . ? 
N2 C4 C5 110.6(2) . . ? 
N4 C5 C4 110.6(2) . . ? 
N4 C6 C3 109.8(2) . . ? 
Si1 C11 Mo1 88.35(10) . . ? 
  
_refine_diff_density_max    0.293 
_refine_diff_density_min   -0.248 
_refine_diff_density_rms    0.045 

data_97001 
  
_audit_creation_method            SHELXL 
_chemical_name_systematic 
; 
 ? 
; 
_chemical_name_common             ? 
_chemical_formula_moiety          ? 
_chemical_formula_structural      ? 
_chemical_formula_analytical      ? 
_chemical_formula_sum             'C16 H42 Mo N4 Si3' 
_chemical_formula_weight          470.75 
_chemical_melting_point           ? 
_chemical_compound_source         ? 
  
loop_ 
 _atom_type_symbol 
 _atom_type_description 
 _atom_type_scat_dispersion_real 
 _atom_type_scat_dispersion_imag 
 _atom_type_scat_source 
 'C'  'C'   0.0033   0.0016 
 'International Tables Vol C Tables 4.2.6.8 and 6.1.1.4' 
 'H'  'H'   0.0000   0.0000 
 'International Tables Vol C Tables 4.2.6.8 and 6.1.1.4' 
 'N'  'N'   0.0061   0.0033 
 'International Tables Vol C Tables 4.2.6.8 and 6.1.1.4' 
 'Si'  'Si'   0.0817   0.0704 
 'International Tables Vol C Tables 4.2.6.8 and 6.1.1.4' 
 'Mo'  'Mo'  -1.6832   0.6857 
 'International Tables Vol C Tables 4.2.6.8 and 6.1.1.4' 
  
_symmetry_cell_setting            Monoclinic 
_symmetry_space_group_name_H-M    Cc 
  
loop_ 
 _symmetry_equiv_pos_as_xyz 
 'x, y, z' 
 'x, -y, z+1/2' 
 'x+1/2, y+1/2, z' 
 'x+1/2, -y+1/2, z+1/2' 
  
_cell_length_a                    17.35280(10) 
_cell_length_b                    9.6851(2) 
_cell_length_c                    15.9445(3) 
_cell_angle_alpha                 90.00 
_cell_angle_beta                  110.6210(10) 
_cell_angle_gamma                 90.00 
_cell_volume                      2508.00(7) 
_cell_formula_units_Z             4 
_cell_measurement_temperature     183(2) 
_cell_measurement_reflns_used     ? 
_cell_measurement_theta_min       ? 
_cell_measurement_theta_max       ? 
  
_exptl_crystal_description        ? 
_exptl_crystal_colour             ? 
_exptl_crystal_size_max           0.17 
_exptl_crystal_size_mid           0.12 
_exptl_crystal_size_min           0.12 
_exptl_crystal_density_meas       ? 
_exptl_crystal_density_diffrn     1.247 
_exptl_crystal_density_method     ? 
_exptl_crystal_F_000              1000 
_exptl_absorpt_coefficient_mu     0.673 
_exptl_absorpt_correction_type    none 
_exptl_absorpt_correction_T_min   ? 
_exptl_absorpt_correction_T_max   ? 
  
_exptl_special_details 
; 
 ? 
; 
  
_diffrn_ambient_temperature       183(2) 
_diffrn_radiation_wavelength      0.71073 
_diffrn_radiation_type            MoK\a 
_diffrn_radiation_source          'fine-focus sealed tube' 
_diffrn_radiation_monochromator   graphite 
_diffrn_measurement_device        'Siemens P4' 
_diffrn_measurement_method        '\w scans' 
_diffrn_standards_number          ? 
_diffrn_standards_interval_count  ? 
_diffrn_standards_interval_time   ? 
_diffrn_standards_decay_%         ? 
_diffrn_reflns_number             5023 
_diffrn_reflns_av_R_equivalents   0.0784 
_diffrn_reflns_av_sigmaI/netI     0.1158 
_diffrn_reflns_limit_h_min        -19 
_diffrn_reflns_limit_h_max        16 
_diffrn_reflns_limit_k_min        -10 
_diffrn_reflns_limit_k_max        10 
_diffrn_reflns_limit_l_min        -17 
_diffrn_reflns_limit_l_max        17 
_diffrn_reflns_theta_min          2.45 
_diffrn_reflns_theta_max          23.28 
_reflns_number_total              2412 
_reflns_number_observed           2094 
_reflns_observed_criterion        >2sigma(I) 
  
_computing_data_collection        'Siemens XSCANS' 
_computing_cell_refinement        'Siemens XSCANS' 
_computing_data_reduction         'Siemens SHELXTL' 
_computing_structure_solution     'SHELXS-86 (Sheldrick, 1990)' 
_computing_structure_refinement   'SHELXL-93 (Sheldrick, 1993)' 
_computing_molecular_graphics     'Siemens SHELXTL' 
_computing_publication_material   'Siemens SHELXTL' 
  
_refine_special_details 
; 
 Refinement on F^2^ for ALL reflections except for 0 with very negative 
F^2^ 
 or flagged by the user for potential systematic errors.  Weighted 
R-factors 
 wR and all goodnesses of fit S are based on F^2^, conventional 
R-factors R 
 are based on F, with F set to zero for negative F^2^. The observed 
criterion 
 of F^2^ > 2sigma(F^2^) is used only for calculating _R_factor_obs etc. 
and is 
 not relevant to the choice of reflections for refinement.  R-factors 
based 
 on F^2^ are statistically about twice as large as those based on F, and 
R- 
 factors based on ALL data will be even larger. 
; 
  
_refine_ls_structure_factor_coef  Fsqd 
_refine_ls_matrix_type            full 
_refine_ls_weighting_scheme 
 'calc w=1/[\s^2^(Fo^2^)+(0.0159P)^2^+3.1068P] where P=(Fo^2^+2Fc^2^)/3' 
_atom_sites_solution_primary      direct 
_atom_sites_solution_secondary    difmap 
_atom_sites_solution_hydrogens    geom 
_refine_ls_hydrogen_treatment     ? 
_refine_ls_extinction_method      SHELXL 
_refine_ls_extinction_coef        0.0003(2) 
_refine_ls_extinction_expression 
 'Fc^*^=kFc[1+0.001xFc^2^\l^3^/sin(2\q)]^-1/4^' 
_refine_ls_abs_structure_details 
 'Flack H D (1983), Acta Cryst. A39, 876-881' 
_refine_ls_abs_structure_Flack    0.08(8) 
_refine_ls_number_reflns          2412 
_refine_ls_number_parameters      217 
_refine_ls_number_restraints      2 
_refine_ls_R_factor_all           0.0799 
_refine_ls_R_factor_obs           0.0660 
_refine_ls_wR_factor_all          0.1148 
_refine_ls_wR_factor_obs          0.1096 
_refine_ls_goodness_of_fit_all    1.085 
_refine_ls_goodness_of_fit_obs    1.119 
_refine_ls_restrained_S_all       1.085 
_refine_ls_restrained_S_obs       1.118 
_refine_ls_shift/esd_max          -0.006 
_refine_ls_shift/esd_mean         0.001 
  
loop_ 
 _atom_site_label 
 _atom_site_type_symbol 
 _atom_site_fract_x 
 _atom_site_fract_y 
 _atom_site_fract_z 
 _atom_site_U_iso_or_equiv 
 _atom_site_thermal_displace_type 
 _atom_site_occupancy 
 _atom_site_calc_flag 
 _atom_site_refinement_flags 
 _atom_site_disorder_group 
Mo1 Mo 0.17908(4) 0.41061(9) 0.43441(4) 0.0224(3) Uani 1 d . . 
Si1 Si 0.3584(2) 0.5694(4) 0.4646(3) 0.0339(9) Uani 1 d . . 
Si2 Si 0.1842(2) 0.1898(4) 0.5982(2) 0.0336(9) Uani 1 d . . 
Si3 Si 0.0161(2) 0.6193(4) 0.3567(3) 0.0369(10) Uani 1 d . . 
N1 N 0.2728(6) 0.4740(9) 0.4004(6) 0.028(2) Uani 1 d . . 
N2 N 0.1907(6) 0.2283(9) 0.4960(6) 0.030(3) Uani 1 d . . 
N3 N 0.0682(6) 0.4651(9) 0.3537(6) 0.032(3) Uani 1 d . . 
N4 N 0.1629(6) 0.2664(9) 0.3145(6) 0.025(2) Uani 1 d . . 
C1 C 0.2656(8) 0.4364(12) 0.3088(7) 0.039(3) Uani 1 d . . 
H1A H 0.3197(8) 0.4475(12) 0.3017(7) 0.047 Uiso 1 calc R . 
H1B H 0.2258(8) 0.4987(12) 0.2656(7) 0.047 Uiso 1 calc R . 
C2 C 0.2367(8) 0.2875(12) 0.2891(9) 0.037(3) Uani 1 d . . 
H2A H 0.2229(8) 0.2676(12) 0.2246(9) 0.045 Uiso 1 calc R . 
H2B H 0.2812(8) 0.2238(12) 0.3237(9) 0.045 Uiso 1 calc R . 
C3 C 0.2124(8) 0.1165(11) 0.4451(8) 0.041(4) Uani 1 d . . 
H3A H 0.2043(8) 0.0257(11) 0.4694(8) 0.049 Uiso 1 calc R . 
H3B H 0.2710(8) 0.1246(11) 0.4512(8) 0.049 Uiso 1 calc R . 
C4 C 0.1583(8) 0.1266(11) 0.3473(8) 0.039(4) Uani 1 d . . 
H4A H 0.1768(8) 0.0590(11) 0.3118(8) 0.047 Uiso 1 calc R . 
H4B H 0.1006(8) 0.1047(11) 0.3402(8) 0.047 Uiso 1 calc R . 
C5 C 0.0268(8) 0.3625(12) 0.2841(9) 0.047(4) Uani 1 d . . 
H5A H -0.0208(8) 0.4056(12) 0.2373(9) 0.057 Uiso 1 calc R . 
H5B H 0.0063(8) 0.2850(12) 0.3109(9) 0.057 Uiso 1 calc R . 
C6 C 0.0875(8) 0.3090(12) 0.2425(8) 0.042(4) Uani 1 d . . 
H6A H 0.0634(8) 0.2296(12) 0.2029(8) 0.050 Uiso 1 calc R . 
H6B H 0.1001(8) 0.3824(12) 0.2061(8) 0.050 Uiso 1 calc R . 
C7 C 0.1942(8) 0.5467(11) 0.5487(8) 0.037(3) Uani 1 d . . 
H7A H 0.2481(8) 0.5302(11) 0.5951(8) 0.056 Uiso 1 calc R . 
H7B H 0.1508(8) 0.5276(11) 0.5731(8) 0.056 Uiso 1 calc R . 
H7C H 0.1905(8) 0.6431(11) 0.5291(8) 0.056 Uiso 1 calc R . 
C11 C 0.3338(9) 0.7589(13) 0.4743(9) 0.059(4) Uani 1 d . . 
H11A H 0.2917(9) 0.7665(13) 0.5020(9) 0.088 Uiso 1 calc R . 
H11B H 0.3133(9) 0.8006(13) 0.4145(9) 0.088 Uiso 1 calc R . 
H11C H 0.3838(9) 0.8072(13) 0.5115(9) 0.088 Uiso 1 calc R . 
C12 C 0.4044(8) 0.4934(14) 0.5783(8) 0.056(4) Uani 1 d . . 
H12A H 0.3637(8) 0.4943(14) 0.6080(8) 0.084 Uiso 1 calc R . 
H12B H 0.4526(8) 0.5477(14) 0.6135(8) 0.084 Uiso 1 calc R . 
H12C H 0.4213(8) 0.3980(14) 0.5733(8) 0.084 Uiso 1 calc R . 
C13 C 0.4378(8) 0.5650(13) 0.4120(9) 0.053(4) Uani 1 d . . 
H13A H 0.4153(8) 0.6046(13) 0.3517(9) 0.079 Uiso 1 calc R . 
H13B H 0.4544(8) 0.4692(13) 0.4081(9) 0.079 Uiso 1 calc R . 
H13C H 0.4858(8) 0.6188(13) 0.4483(9) 0.079 Uiso 1 calc R . 
C21 C 0.2830(10) 0.2188(14) 0.6913(9) 0.065(5) Uani 1 d . . 
H21A H 0.3268(10) 0.1666(14) 0.6801(9) 0.098 Uiso 1 calc R . 
H21B H 0.2780(10) 0.1876(14) 0.7477(9) 0.098 Uiso 1 calc R . 
H21C H 0.2965(10) 0.3174(14) 0.6955(9) 0.098 Uiso 1 calc R . 
C22 C 0.0997(9) 0.2862(13) 0.6164(9) 0.049(4) Uani 1 d . . 
H22A H 0.0482(9) 0.2692(13) 0.5663(9) 0.074 Uiso 1 calc R . 
H22B H 0.1122(9) 0.3852(13) 0.6202(9) 0.074 Uiso 1 calc R . 
H22C H 0.0938(9) 0.2555(13) 0.6724(9) 0.074 Uiso 1 calc R . 
C23 C 0.1588(9) 0.0009(13) 0.6036(8) 0.055(4) Uani 1 d . . 
H23A H 0.2019(9) -0.0558(13) 0.5943(8) 0.082 Uiso 1 calc R . 
H23B H 0.1057(9) -0.0197(13) 0.5568(8) 0.082 Uiso 1 calc R . 
H23C H 0.1557(9) -0.0197(13) 0.6625(8) 0.082 Uiso 1 calc R . 
C31 C 0.0881(9) 0.7684(13) 0.3736(10) 0.056(4) Uani 1 d . . 
H31A H 0.1121(9) 0.7684(13) 0.3264(10) 0.084 Uiso 1 calc R . 
H31B H 0.1321(9) 0.7604(13) 0.4322(10) 0.084 Uiso 1 calc R . 
H31C H 0.0579(9) 0.8547(13) 0.3710(10) 0.084 Uiso 1 calc R . 
C33 C -0.0688(9) 0.6481(15) 0.2459(9) 0.059(4) Uani 1 d . . 
H33A H -0.0457(9) 0.6496(15) 0.1980(9) 0.088 Uiso 1 calc R . 
H33B H -0.0959(9) 0.7364(15) 0.2471(9) 0.088 Uiso 1 calc R . 
H33C H -0.1091(9) 0.5731(15) 0.2348(9) 0.088 Uiso 1 calc R . 
C32 C -0.0304(10) 0.6171(16) 0.4460(11) 0.075(5) Uani 1 d . . 
H32A H -0.0681(10) 0.5384(16) 0.4364(11) 0.113 Uiso 1 calc R . 
H32B H -0.0610(10) 0.7030(16) 0.4436(11) 0.113 Uiso 1 calc R . 
H32C H 0.0133(10) 0.6086(16) 0.5048(11) 0.113 Uiso 1 calc R . 
  
loop_ 
 _atom_site_aniso_label 
 _atom_site_aniso_U_11 
 _atom_site_aniso_U_22 
 _atom_site_aniso_U_33 
 _atom_site_aniso_U_23 
 _atom_site_aniso_U_13 
 _atom_site_aniso_U_12 
Mo1 0.0261(5) 0.0206(5) 0.0212(5) -0.0023(7) 0.0091(4) 0.0006(8) 
Si1 0.030(2) 0.029(2) 0.036(2) -0.001(2) 0.005(2) -0.005(2) 
Si2 0.037(2) 0.039(2) 0.022(2) 0.006(2) 0.007(2) 0.000(2) 
Si3 0.032(2) 0.033(2) 0.048(3) 0.008(2) 0.018(2) 0.007(2) 
N1 0.027(6) 0.037(6) 0.022(6) -0.018(5) 0.010(5) -0.010(5) 
N2 0.042(7) 0.023(6) 0.025(6) 0.005(5) 0.012(5) 0.009(5) 
N3 0.044(7) 0.031(5) 0.019(6) 0.001(5) 0.008(5) 0.000(5) 
N4 0.037(7) 0.026(6) 0.006(5) -0.001(5) -0.002(5) -0.001(5) 
C1 0.035(8) 0.048(9) 0.028(7) 0.012(6) 0.005(6) -0.010(7) 
C2 0.046(9) 0.034(8) 0.048 0.000(7) 0.037(6) 0.015(7) 
C3 0.061(10) 0.030(7) 0.042(9) 0.018(7) 0.031(9) 0.016(7) 
C4 0.058(10) 0.023(8) 0.040(8) -0.005(6) 0.021(8) -0.008(7) 
C5 0.044(9) 0.030(7) 0.063(10) -0.007(7) 0.013(8) 0.002(7) 
C6 0.056(10) 0.043(8) 0.019(7) -0.005(6) 0.005(7) -0.014(8) 
C7 0.042(9) 0.031(8) 0.037(8) 0.005(6) 0.012(7) -0.001(7) 
C11 0.058(11) 0.048(9) 0.052(10) -0.005(7) -0.005(8) -0.011(8) 
C12 0.026(8) 0.076(11) 0.054(10) 0.001(8) 0.001(7) -0.030(8) 
C13 0.040(9) 0.055(10) 0.061(10) 0.003(8) 0.016(8) -0.009(8) 
C21 0.071(12) 0.066(10) 0.037(9) 0.002(8) -0.010(8) 0.015(9) 
C22 0.058(10) 0.052(9) 0.044(10) -0.002(7) 0.024(9) -0.007(8) 
C23 0.079(12) 0.052(9) 0.039(9) 0.005(7) 0.029(8) -0.004(9) 
C31 0.047(10) 0.043(9) 0.081(11) -0.014(8) 0.028(9) 0.003(8) 
C33 0.038(9) 0.066(10) 0.064(11) 0.020(9) 0.007(8) 0.020(7) 
C32 0.070(13) 0.088(13) 0.078(13) 0.010(10) 0.041(11) 0.037(11) 
  
_geom_special_details 
; 
 All esds (except the esd in the dihedral angle between two l.s. planes) 
 are estimated using the full covariance matrix.  The cell esds are 
taken 
 into account individually in the estimation of esds in distances, 
angles 
 and torsion angles; correlations between esds in cell parameters are 
only 
 used when they are defined by crystal symmetry.  An approximate 
(isotropic) 
 treatment of cell esds is used for estimating esds involving l.s. 
planes. 
; 
  
loop_ 
 _geom_bond_atom_site_label_1 
 _geom_bond_atom_site_label_2 
 _geom_bond_distance 
 _geom_bond_site_symmetry_2 
 _geom_bond_publ_flag 
Mo1 N3 1.973(10) . ? 
Mo1 N1 1.984(9) . ? 
Mo1 N2 1.996(9) . ? 
Mo1 C7 2.188(11) . ? 
Mo1 N4 2.304(9) . ? 
Si1 N1 1.742(9) . ? 
Si1 C13 1.848(14) . ? 
Si1 C12 1.856(13) . ? 
Si1 C11 1.902(13) . ? 
Si2 N2 1.714(9) . ? 
Si2 C22 1.846(14) . ? 
Si2 C21 1.852(15) . ? 
Si2 C23 1.891(13) . ? 
Si3 N3 1.755(10) . ? 
Si3 C32 1.87(2) . ? 
Si3 C31 1.866(14) . ? 
Si3 C33 1.881(13) . ? 
N1 C1 1.468(13) . ? 
N2 C3 1.478(13) . ? 
N3 C5 1.474(14) . ? 
N4 C4 1.464(14) . ? 
N4 C6 1.463(15) . ? 
N4 C2 1.49(2) . ? 
C1 C2 1.52(2) . ? 
C3 C4 1.51(2) . ? 
C5 C6 1.52(2) . ? 
  
loop_ 
 _geom_angle_atom_site_label_1 
 _geom_angle_atom_site_label_2 
 _geom_angle_atom_site_label_3 
 _geom_angle 
 _geom_angle_site_symmetry_1 
 _geom_angle_site_symmetry_3 
 _geom_angle_publ_flag 
N3 Mo1 N1 116.4(4) . . ? 
N3 Mo1 N2 117.6(4) . . ? 
N1 Mo1 N2 117.2(4) . . ? 
N3 Mo1 C7 100.7(4) . . ? 
N1 Mo1 C7 99.9(4) . . ? 
N2 Mo1 C7 99.3(4) . . ? 
N3 Mo1 N4 79.3(4) . . ? 
N1 Mo1 N4 80.4(4) . . ? 
N2 Mo1 N4 80.4(4) . . ? 
C7 Mo1 N4 179.7(4) . . ? 
N1 Si1 C13 109.8(5) . . ? 
N1 Si1 C12 110.3(5) . . ? 
C13 Si1 C12 107.5(6) . . ? 
N1 Si1 C11 113.0(6) . . ? 
C13 Si1 C11 106.5(6) . . ? 
C12 Si1 C11 109.6(6) . . ? 
N2 Si2 C22 111.2(5) . . ? 
N2 Si2 C21 112.1(6) . . ? 
C22 Si2 C21 111.0(6) . . ? 
N2 Si2 C23 110.4(5) . . ? 
C22 Si2 C23 105.8(6) . . ? 
C21 Si2 C23 105.9(6) . . ? 
N3 Si3 C32 112.1(6) . . ? 
N3 Si3 C31 109.8(5) . . ? 
C32 Si3 C31 110.3(7) . . ? 
N3 Si3 C33 109.9(6) . . ? 
C32 Si3 C33 108.1(7) . . ? 
C31 Si3 C33 106.5(7) . . ? 
C1 N1 Si1 118.2(7) . . ? 
C1 N1 Mo1 113.8(7) . . ? 
Si1 N1 Mo1 128.0(5) . . ? 
C3 N2 Si2 118.5(7) . . ? 
C3 N2 Mo1 112.3(6) . . ? 
Si2 N2 Mo1 129.1(5) . . ? 
C5 N3 Si3 118.4(8) . . ? 
C5 N3 Mo1 114.5(7) . . ? 
Si3 N3 Mo1 127.1(5) . . ? 
C4 N4 C6 113.2(9) . . ? 
C4 N4 C2 112.7(9) . . ? 
C6 N4 C2 111.5(9) . . ? 
C4 N4 Mo1 105.7(7) . . ? 
C6 N4 Mo1 107.1(7) . . ? 
C2 N4 Mo1 106.1(7) . . ? 
N1 C1 C2 110.3(9) . . ? 
N4 C2 C1 109.0(9) . . ? 
N2 C3 C4 109.5(9) . . ? 
N4 C4 C3 109.6(9) . . ? 
N3 C5 C6 109.2(11) . . ? 
N4 C6 C5 108.7(10) . . ? 
  
_refine_diff_density_max    0.720 
_refine_diff_density_min   -0.800 
_refine_diff_density_rms    0.101
 

data_95066 
  
_audit_creation_method            SHELXL 
_chemical_name_systematic 
; 
 ? 
; 
_chemical_name_common             ? 
_chemical_formula_moiety          ? 
_chemical_formula_structural      ? 
_chemical_formula_analytical      ? 
_chemical_formula_sum             'C16 H39 F3 Mo N4 O3 S Si3' 
_chemical_formula_weight          604.78 
_chemical_melting_point           ? 
_chemical_compound_source         ? 
  
loop_ 
 _atom_type_symbol 
 _atom_type_description 
 _atom_type_scat_dispersion_real 
 _atom_type_scat_dispersion_imag 
 _atom_type_scat_source 
 'C'  'C'   0.0033   0.0016 
 'International Tables Vol C Tables 4.2.6.8 and 6.1.1.4' 
 'H'  'H'   0.0000   0.0000 
 'International Tables Vol C Tables 4.2.6.8 and 6.1.1.4' 
 'N'  'N'   0.0061   0.0033 
 'International Tables Vol C Tables 4.2.6.8 and 6.1.1.4' 
 'O'  'O'   0.0106   0.0060 
 'International Tables Vol C Tables 4.2.6.8 and 6.1.1.4' 
 'F'  'F'   0.0171   0.0103 
 'International Tables Vol C Tables 4.2.6.8 and 6.1.1.4' 
 'Si'  'Si'   0.0817   0.0704 
 'International Tables Vol C Tables 4.2.6.8 and 6.1.1.4' 
 'S'  'S'   0.1246   0.1234 
 'International Tables Vol C Tables 4.2.6.8 and 6.1.1.4' 
 'Mo'  'Mo'  -1.6832   0.6857 
 'International Tables Vol C Tables 4.2.6.8 and 6.1.1.4' 
  
_symmetry_cell_setting            Orthorhombic 
_symmetry_space_group_name_H-M    Pna2(1) 
  
loop_ 
 _symmetry_equiv_pos_as_xyz 
 'x, y, z' 
 '-x, -y, z+1/2' 
 'x+1/2, -y+1/2, z' 
 '-x+1/2, y+1/2, z+1/2' 
  
_cell_length_a                    20.951(4) 
_cell_length_b                    10.999(2) 
_cell_length_c                    12.050(2) 
_cell_angle_alpha                 90.00 
_cell_angle_beta                  90.00 
_cell_angle_gamma                 90.00 
_cell_volume                      2776.7(10) 
_cell_formula_units_Z             4 
_cell_measurement_temperature     188(2) 
_cell_measurement_reflns_used     ? 
_cell_measurement_theta_min       ? 
_cell_measurement_theta_max       ? 
  
_exptl_crystal_description        ? 
_exptl_crystal_colour             ? 
_exptl_crystal_size_max           0.32 
_exptl_crystal_size_mid           0.29 
_exptl_crystal_size_min           0.23 
_exptl_crystal_density_meas       ? 
_exptl_crystal_density_diffrn     1.447 
_exptl_crystal_density_method     ? 
_exptl_crystal_F_000              1256 
_exptl_absorpt_coefficient_mu     0.720 
_exptl_absorpt_correction_type    none 
_exptl_absorpt_correction_T_min   ? 
_exptl_absorpt_correction_T_max   ? 
  
_exptl_special_details 
; 
 ? 
; 
  
_diffrn_ambient_temperature       188(2) 
_diffrn_radiation_wavelength      0.71073 
_diffrn_radiation_type            MoK\a 
_diffrn_radiation_source          'fine-focus sealed tube' 
_diffrn_radiation_monochromator   graphite 
_diffrn_measurement_device        'Siemens P4' 
_diffrn_measurement_method        '\w scans' 
_diffrn_standards_number          ? 
_diffrn_standards_interval_count  ? 
_diffrn_standards_interval_time   ? 
_diffrn_standards_decay_%         ? 
_diffrn_reflns_number             7745 
_diffrn_reflns_av_R_equivalents   0.0866 
_diffrn_reflns_av_sigmaI/netI     0.0633 
_diffrn_reflns_limit_h_min        -13 
_diffrn_reflns_limit_h_max        23 
_diffrn_reflns_limit_k_min        -12 
_diffrn_reflns_limit_k_max        6 
_diffrn_reflns_limit_l_min        -13 
_diffrn_reflns_limit_l_max        13 
_diffrn_reflns_theta_min          1.94 
_diffrn_reflns_theta_max          19.99 
_reflns_number_total              2595 
_reflns_number_observed           2268 
_reflns_observed_criterion        >2sigma(I) 
  
_computing_data_collection        'Siemens XSCANS' 
_computing_cell_refinement        'Siemens XSCANS' 
_computing_data_reduction         'Siemens SHELXTL' 
_computing_structure_solution     'SHELXS-86 (Sheldrick, 1990)' 
_computing_structure_refinement   'SHELXL-93 (Sheldrick, 1993)' 
_computing_molecular_graphics     'Siemens SHELXTL' 
_computing_publication_material   'Siemens SHELXTL' 
  
_refine_special_details 
; 
 Refinement on F^2^ for ALL reflections except for 36 with very negative 
F^2^ 
 or flagged by the user for potential systematic errors.  Weighted 
R-factors 
 wR and all goodnesses of fit S are based on F^2^, conventional 
R-factors R 
 are based on F, with F set to zero for negative F^2^. The observed 
criterion 
 of F^2^ > 2sigma(F^2^) is used only for calculating _R_factor_obs etc. 
and is 
 not relevant to the choice of reflections for refinement.  R-factors 
based 
 on F^2^ are statistically about twice as large as those based on F, and 
R- 
 factors based on ALL data will be even larger. 
; 
  
_refine_ls_structure_factor_coef  Fsqd 
_refine_ls_matrix_type            full 
_refine_ls_weighting_scheme 
 'calc w=1/[\s^2^(Fo^2^)+(0.0526P)^2^+12.7601P] where 
P=(Fo^2^+2Fc^2^)/3' 
_atom_sites_solution_primary      direct 
_atom_sites_solution_secondary    difmap 
_atom_sites_solution_hydrogens    geom 
_refine_ls_hydrogen_treatment     ? 
_refine_ls_extinction_method      SHELXL 
_refine_ls_extinction_coef        0.0034(5) 
_refine_ls_extinction_expression 
 'Fc^*^=kFc[1+0.001xFc^2^\l^3^/sin(2\q)]^-1/4^' 
_refine_ls_abs_structure_details 
 'Flack H D (1983), Acta Cryst. A39, 876-881' 
_refine_ls_abs_structure_Flack    0.61(10) 
_refine_ls_number_reflns          2559 
_refine_ls_number_parameters      282 
_refine_ls_number_restraints      1 
_refine_ls_R_factor_all           0.0644 
_refine_ls_R_factor_obs           0.0486 
_refine_ls_wR_factor_all          0.1542 
_refine_ls_wR_factor_obs          0.1068 
_refine_ls_goodness_of_fit_all    0.996 
_refine_ls_goodness_of_fit_obs    1.016 
_refine_ls_restrained_S_all       1.361 
_refine_ls_restrained_S_obs       1.016 
_refine_ls_shift/esd_max          -0.041 
_refine_ls_shift/esd_mean         0.008 
  
loop_ 
 _atom_site_label 
 _atom_site_type_symbol 
 _atom_site_fract_x 
 _atom_site_fract_y 
 _atom_site_fract_z 
 _atom_site_U_iso_or_equiv 
 _atom_site_thermal_displace_type 
 _atom_site_occupancy 
 _atom_site_calc_flag 
 _atom_site_refinement_flags 
 _atom_site_disorder_group 
Mo Mo 0.15172(3) 0.25164(8) 0.63509(12) 0.0209(3) Uani 1 d . . 
S S 0.16058(15) 0.1605(3) 0.3521(3) 0.0418(9) Uani 1 d . . 
Si1 Si 0.09070(13) -0.0328(2) 0.6319(4) 0.0335(8) Uani 1 d . . 
Si2 Si 0.05421(15) 0.4726(3) 0.5398(3) 0.0315(9) Uani 1 d . . 
Si3 Si 0.30770(15) 0.2839(3) 0.5995(2) 0.0324(9) Uani 1 d . . 
F1 F 0.1742(5) 0.2463(9) 0.1521(9) 0.103(3) Uani 1 d . . 
F2 F 0.1427(5) 0.3775(8) 0.2689(9) 0.111(3) Uani 1 d . . 
F3 F 0.2399(5) 0.3191(8) 0.2708(8) 0.099(3) Uani 1 d . . 
O1 O 0.1670(4) 0.2217(7) 0.4594(7) 0.034(2) Uani 1 d . . 
O2 O 0.2090(4) 0.0739(8) 0.3298(7) 0.057(2) Uani 1 d . . 
O3 O 0.0970(4) 0.1281(8) 0.3247(8) 0.062(3) Uani 1 d . . 
N1 N 0.0931(4) 0.1189(8) 0.6774(7) 0.027(2) Uani 1 d . . 
N2 N 0.1144(3) 0.4163(6) 0.6245(9) 0.024(2) Uani 1 d . . 
N3 N 0.2427(4) 0.2377(7) 0.6780(7) 0.026(2) Uani 1 d . . 
N4 N 0.1427(4) 0.2912(10) 0.8109(7) 0.022(2) Uani 1 d . . 
C1T C 0.1810(10) 0.2837(14) 0.2555(13) 0.069(4) Uani 1 d . . 
C1 C 0.0561(5) 0.1521(9) 0.7764(9) 0.033(3) Uani 1 d . . 
H1A H 0.0316(5) 0.0812(9) 0.8036(9) 0.039 Uiso 1 calc R . 
H1B H 0.0258(5) 0.2184(9) 0.7587(9) 0.039 Uiso 1 calc R . 
C2 C 0.1030(5) 0.1935(10) 0.8635(10) 0.032(3) Uani 1 d . . 
H2B H 0.0802(5) 0.2257(10) 0.9291(10) 0.039 Uiso 1 calc R . 
H2C H 0.1304(5) 0.1249(10) 0.8874(10) 0.039 Uiso 1 calc R . 
C3 C 0.1293(5) 0.4875(10) 0.7257(10) 0.035(3) Uani 1 d . . 
H3B H 0.1051(5) 0.5649(10) 0.7256(10) 0.042 Uiso 1 calc R . 
H3C H 0.1755(5) 0.5067(10) 0.7283(10) 0.042 Uiso 1 calc R . 
C4 C 0.1107(5) 0.4118(9) 0.8245(9) 0.033(3) Uani 1 d . . 
H4A H 0.1250(5) 0.4513(9) 0.8940(9) 0.039 Uiso 1 calc R . 
H4B H 0.0638(5) 0.4016(9) 0.8275(9) 0.039 Uiso 1 calc R . 
C5 C 0.2488(5) 0.2104(10) 0.7983(9) 0.036(3) Uani 1 d . . 
H5A H 0.2357(5) 0.1254(10) 0.8127(9) 0.043 Uiso 1 calc R . 
H5B H 0.2938(5) 0.2198(10) 0.8216(9) 0.043 Uiso 1 calc R . 
C6 C 0.2083(5) 0.2937(11) 0.8622(10) 0.037(3) Uani 1 d . . 
H6A H 0.2260(5) 0.3771(11) 0.8596(10) 0.044 Uiso 1 calc R . 
H6B H 0.2061(5) 0.2674(11) 0.9407(10) 0.044 Uiso 1 calc R . 
C11 C 0.1653(6) -0.0751(10) 0.5642(11) 0.051(4) Uani 1 d . . 
H11A H 0.2010(6) -0.0615(10) 0.6153(11) 0.076 Uiso 1 calc R . 
H11B H 0.1712(6) -0.0255(10) 0.4975(11) 0.076 Uiso 1 calc R . 
H11C H 0.1638(6) -0.1612(10) 0.5435(11) 0.076 Uiso 1 calc R . 
C12 C 0.0208(7) -0.0554(12) 0.5411(13) 0.072(5) Uani 1 d . . 
H12A H -0.0180(7) -0.0317(12) 0.5808(13) 0.108 Uiso 1 calc R . 
H12B H 0.0180(7) -0.1412(12) 0.5198(13) 0.108 Uiso 1 calc R . 
H12C H 0.0254(7) -0.0052(12) 0.4743(13) 0.108 Uiso 1 calc R . 
C13 C 0.0815(6) -0.1336(10) 0.7558(12) 0.054(4) Uani 1 d . . 
H13A H 0.0417(6) -0.1134(10) 0.7945(12) 0.081 Uiso 1 calc R . 
H13B H 0.1177(6) -0.1215(10) 0.8061(12) 0.081 Uiso 1 calc R . 
H13C H 0.0802(6) -0.2187(10) 0.7318(12) 0.081 Uiso 1 calc R . 
C21 C 0.0872(6) 0.5913(11) 0.4489(11) 0.052(4) Uani 1 d . . 
H21A H 0.1064(6) 0.6555(11) 0.4943(11) 0.078 Uiso 1 calc R . 
H21B H 0.0529(6) 0.6259(11) 0.4035(11) 0.078 Uiso 1 calc R . 
H21C H 0.1198(6) 0.5558(11) 0.4005(11) 0.078 Uiso 1 calc R . 
C22 C 0.0174(6) 0.3492(12) 0.4603(10) 0.046(4) Uani 1 d . . 
H22A H 0.0498(6) 0.3102(12) 0.4136(10) 0.069 Uiso 1 calc R . 
H22B H -0.0166(6) 0.3823(12) 0.4132(10) 0.069 Uiso 1 calc R . 
H22C H -0.0007(6) 0.2891(12) 0.5114(10) 0.069 Uiso 1 calc R . 
C23 C -0.0095(5) 0.5421(9) 0.6250(13) 0.050(3) Uani 1 d . . 
H23A H 0.0084(5) 0.6088(9) 0.6691(13) 0.075 Uiso 1 calc R . 
H23B H -0.0276(5) 0.4806(9) 0.6747(13) 0.075 Uiso 1 calc R . 
H23C H -0.0431(5) 0.5738(9) 0.5763(13) 0.075 Uiso 1 calc R . 
C31 C 0.3777(6) 0.3178(12) 0.6907(11) 0.055(4) Uani 1 d . . 
H31A H 0.3665(6) 0.3832(12) 0.7425(11) 0.082 Uiso 1 calc R . 
H31B H 0.4139(6) 0.3434(12) 0.6449(11) 0.082 Uiso 1 calc R . 
H31C H 0.3893(6) 0.2447(12) 0.7326(11) 0.082 Uiso 1 calc R . 
C32 C 0.3318(5) 0.1599(11) 0.5042(10) 0.044(3) Uani 1 d . . 
H32A H 0.3426(5) 0.0872(11) 0.5475(10) 0.066 Uiso 1 calc R . 
H32B H 0.3691(5) 0.1856(11) 0.4612(10) 0.066 Uiso 1 calc R . 
H32C H 0.2965(5) 0.1412(11) 0.4537(10) 0.066 Uiso 1 calc R . 
C33 C 0.2867(6) 0.4257(10) 0.5232(10) 0.047(3) Uani 1 d . . 
H33A H 0.2744(6) 0.4889(10) 0.5764(10) 0.070 Uiso 1 calc R . 
H33B H 0.2509(6) 0.4095(10) 0.4730(10) 0.070 Uiso 1 calc R . 
H33C H 0.3236(6) 0.4533(10) 0.4802(10) 0.070 Uiso 1 calc R . 
  
loop_ 
 _atom_site_aniso_label 
 _atom_site_aniso_U_11 
 _atom_site_aniso_U_22 
 _atom_site_aniso_U_33 
 _atom_site_aniso_U_23 
 _atom_site_aniso_U_13 
 _atom_site_aniso_U_12 
Mo 0.0213(5) 0.0210(5) 0.0204(5) -0.0013(4) -0.0003(6) 0.0009(4) 
S 0.047(2) 0.047(2) 0.031(2) -0.004(2) 0.002(2) 0.013(2) 
Si1 0.038(2) 0.0251(15) 0.038(2) -0.008(2) -0.008(2) -0.0036(13) 
Si2 0.032(2) 0.028(2) 0.034(2) 0.000(2) -0.003(2) 0.004(2) 
Si3 0.026(2) 0.034(2) 0.037(2) -0.0030(15) 0.0052(14) 0.0016(14) 
F1 0.149(8) 0.128(7) 0.031(6) 0.005(6) 0.012(6) 0.013(6) 
F2 0.168(10) 0.080(6) 0.085(7) 0.042(6) 0.028(7) 0.039(7) 
F3 0.088(7) 0.125(8) 0.085(7) 0.021(6) 0.035(6) -0.034(6) 
O1 0.042(5) 0.033(5) 0.026(6) -0.006(4) 0.012(4) 0.002(4) 
O2 0.061(6) 0.063(6) 0.047(6) -0.021(5) 0.000(5) 0.027(5) 
O3 0.036(6) 0.076(7) 0.074(7) -0.026(5) -0.012(5) 0.004(5) 
N1 0.020(5) 0.030(5) 0.031(6) -0.004(4) 0.006(4) -0.002(4) 
N2 0.023(4) 0.024(4) 0.023(5) -0.002(6) -0.007(5) -0.002(4) 
N3 0.028(5) 0.023(5) 0.027(7) 0.002(4) -0.002(4) -0.007(4) 
N4 0.015(5) 0.040(6) 0.012(6) -0.004(5) -0.001(4) -0.001(5) 
C1T 0.093(13) 0.068(12) 0.046(11) -0.003(9) 0.023(9) 0.022(11) 
C1 0.040(7) 0.026(7) 0.033(8) 0.001(6) 0.007(7) -0.007(6) 
C2 0.038(7) 0.031(7) 0.028(7) 0.002(6) 0.000(6) -0.006(6) 
C3 0.028(7) 0.027(7) 0.049(9) 0.003(7) -0.015(6) -0.001(5) 
C4 0.032(7) 0.033(7) 0.034(8) -0.017(6) -0.002(6) -0.003(6) 
C5 0.022(7) 0.051(7) 0.033(8) 0.023(6) -0.003(6) 0.004(6) 
C6 0.018(6) 0.057(8) 0.035(7) -0.005(7) 0.006(6) 0.007(6) 
C11 0.065(9) 0.041(7) 0.047(9) -0.002(7) -0.002(7) 0.001(7) 
C12 0.074(11) 0.059(9) 0.083(12) -0.017(10) -0.022(9) -0.004(8) 
C13 0.067(9) 0.026(7) 0.070(10) 0.012(7) 0.003(8) -0.011(7) 
C21 0.063(9) 0.041(8) 0.052(9) 0.001(7) -0.007(7) -0.001(7) 
C22 0.028(7) 0.071(9) 0.040(8) 0.006(7) -0.003(6) 0.004(7) 
C23 0.047(7) 0.048(7) 0.056(8) -0.001(9) -0.023(8) 0.018(6) 
C31 0.028(7) 0.058(9) 0.077(10) -0.003(7) -0.002(7) -0.010(7) 
C32 0.027(7) 0.054(8) 0.051(9) -0.001(7) 0.005(7) 0.006(6) 
C33 0.045(8) 0.045(8) 0.051(9) 0.001(7) 0.013(7) -0.016(6) 
  
_geom_special_details 
; 
 All esds (except the esd in the dihedral angle between two l.s. planes) 
 are estimated using the full covariance matrix.  The cell esds are 
taken 
 into account individually in the estimation of esds in distances, 
angles 
 and torsion angles; correlations between esds in cell parameters are 
only 
 used when they are defined by crystal symmetry.  An approximate 
(isotropic) 
 treatment of cell esds is used for estimating esds involving l.s. 
planes. 
; 
  
loop_ 
 _geom_bond_atom_site_label_1 
 _geom_bond_atom_site_label_2 
 _geom_bond_distance 
 _geom_bond_site_symmetry_2 
 _geom_bond_publ_flag 
Mo N3 1.980(8) . ? 
Mo N2 1.977(7) . ? 
Mo N1 1.974(8) . ? 
Mo O1 2.166(8) . ? 
Mo N4 2.171(9) . ? 
S O2 1.417(8) . ? 
S O3 1.417(8) . ? 
S O1 1.465(9) . ? 
S C1T 1.84(2) . ? 
Si1 N1 1.757(9) . ? 
Si1 C11 1.824(13) . ? 
Si1 C12 1.845(13) . ? 
Si1 C13 1.869(13) . ? 
Si2 N2 1.736(9) . ? 
Si2 C22 1.832(12) . ? 
Si2 C23 1.849(13) . ? 
Si2 C21 1.839(12) . ? 
Si3 N3 1.735(9) . ? 
Si3 C32 1.853(12) . ? 
Si3 C33 1.864(12) . ? 
Si3 C31 1.870(12) . ? 
F1 C1T 1.32(2) . ? 
F2 C1T 1.32(2) . ? 
F3 C1T 1.31(2) . ? 
N1 C1 1.469(13) . ? 
N2 C3 1.483(15) . ? 
N3 C5 1.486(13) . ? 
N4 C2 1.499(14) . ? 
N4 C4 1.495(14) . ? 
N4 C6 1.508(13) . ? 
C1 C2 1.507(14) . ? 
C3 C4 1.50(2) . ? 
C5 C6 1.47(2) . ? 
  
loop_ 
 _geom_angle_atom_site_label_1 
 _geom_angle_atom_site_label_2 
 _geom_angle_atom_site_label_3 
 _geom_angle 
 _geom_angle_site_symmetry_1 
 _geom_angle_site_symmetry_3 
 _geom_angle_publ_flag 
N3 Mo N2 117.9(3) . . ? 
N3 Mo N1 118.3(3) . . ? 
N2 Mo N1 116.6(3) . . ? 
N3 Mo O1 95.8(3) . . ? 
N2 Mo O1 97.7(4) . . ? 
N1 Mo O1 103.4(3) . . ? 
N3 Mo N4 81.1(3) . . ? 
N2 Mo N4 81.1(4) . . ? 
N1 Mo N4 80.9(4) . . ? 
O1 Mo N4 175.6(3) . . ? 
O2 S O3 117.3(5) . . ? 
O2 S O1 114.2(5) . . ? 
O3 S O1 114.1(5) . . ? 
O2 S C1T 102.1(7) . . ? 
O3 S C1T 104.9(8) . . ? 
O1 S C1T 101.5(6) . . ? 
N1 Si1 C11 111.0(5) . . ? 
N1 Si1 C12 109.6(5) . . ? 
C11 Si1 C12 112.3(7) . . ? 
N1 Si1 C13 108.5(5) . . ? 
C11 Si1 C13 107.1(6) . . ? 
C12 Si1 C13 108.2(6) . . ? 
N2 Si2 C22 110.4(5) . . ? 
N2 Si2 C23 110.2(5) . . ? 
C22 Si2 C23 107.0(6) . . ? 
N2 Si2 C21 109.3(5) . . ? 
C22 Si2 C21 111.8(6) . . ? 
C23 Si2 C21 107.9(6) . . ? 
N3 Si3 C32 109.7(5) . . ? 
N3 Si3 C33 109.2(5) . . ? 
C32 Si3 C33 112.0(5) . . ? 
N3 Si3 C31 110.7(5) . . ? 
C32 Si3 C31 107.3(6) . . ? 
C33 Si3 C31 108.0(6) . . ? 
S O1 Mo 156.9(5) . . ? 
C1 N1 Si1 118.3(7) . . ? 
C1 N1 Mo 110.7(6) . . ? 
Si1 N1 Mo 129.8(5) . . ? 
C3 N2 Si2 116.6(6) . . ? 
C3 N2 Mo 110.3(7) . . ? 
Si2 N2 Mo 130.7(5) . . ? 
C5 N3 Si3 121.6(7) . . ? 
C5 N3 Mo 110.7(6) . . ? 
Si3 N3 Mo 126.2(5) . . ? 
C2 N4 C4 110.0(8) . . ? 
C2 N4 C6 110.2(9) . . ? 
C4 N4 C6 110.3(9) . . ? 
C2 N4 Mo 108.5(7) . . ? 
C4 N4 Mo 108.9(7) . . ? 
C6 N4 Mo 108.9(6) . . ? 
F2 C1T F1 107.1(15) . . ? 
F2 C1T F3 108.9(14) . . ? 
F1 C1T F3 109.2(13) . . ? 
F2 C1T S 111.0(11) . . ? 
F1 C1T S 110.1(12) . . ? 
F3 C1T S 110.5(12) . . ? 
N1 C1 C2 107.2(8) . . ? 
N4 C2 C1 106.4(9) . . ? 
N2 C3 C4 107.7(8) . . ? 
N4 C4 C3 106.8(9) . . ? 
C6 C5 N3 109.6(9) . . ? 
C5 C6 N4 107.5(10) . . ? 
  
_refine_diff_density_max    0.458 
_refine_diff_density_min   -0.725 
_refine_diff_density_rms    0.129 
